# Supplementary material
Source: PubMed Central journal article supplement (PMC5520529)

**population A1**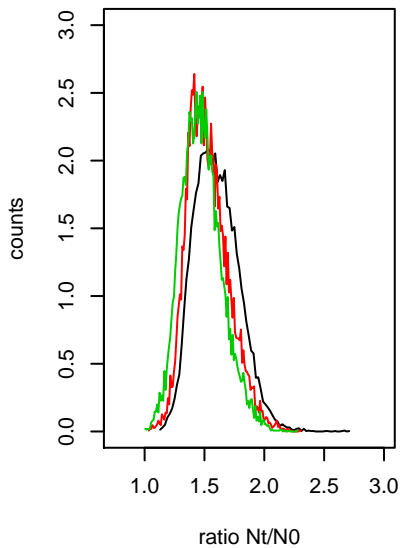**population A2**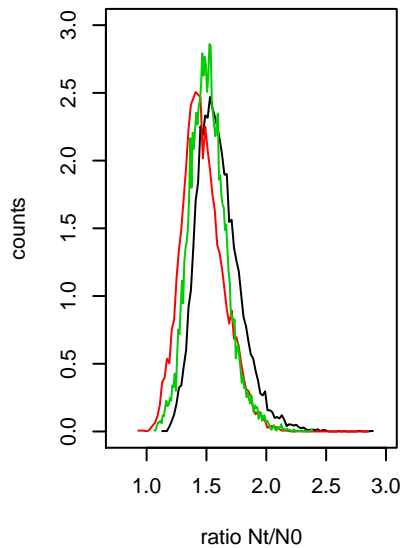**population A3**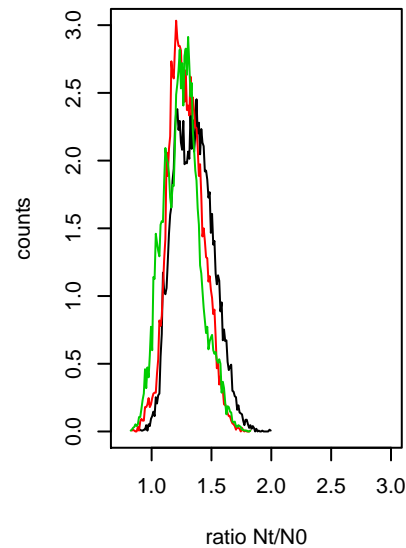**population B1**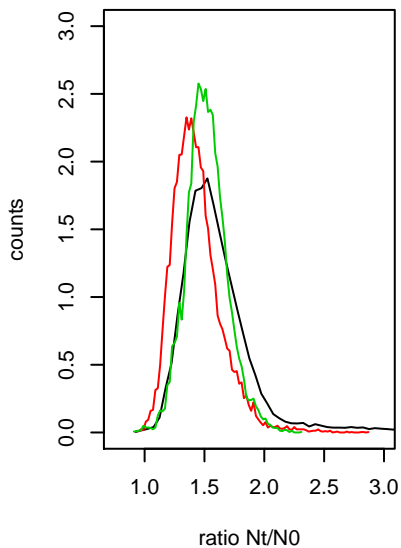**population B2**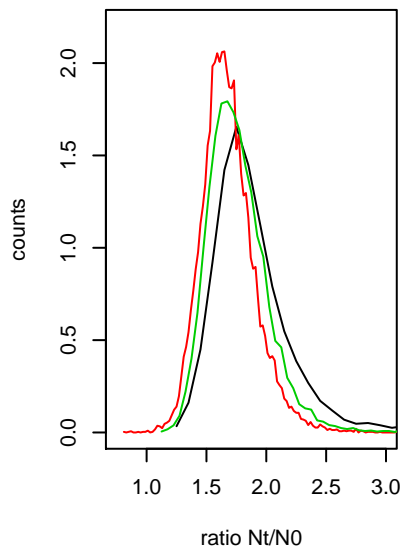**population B3**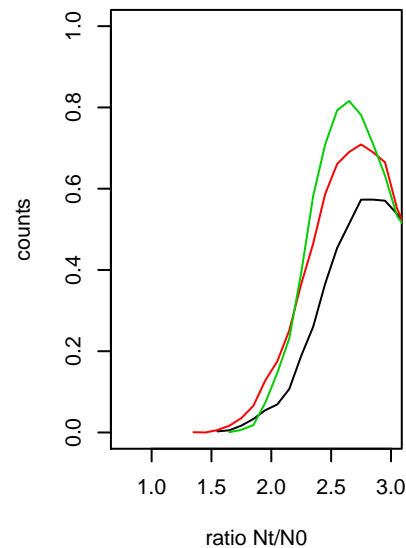

Supplement: hdy2016123x12.pdf [file hdy2016123x12.pdf]
